# Supplementary material for: The role of solar radiation and tidal emersion on oxidative stress and glutathione synthesis in mussels exposed to air
Source: PeerJ. 2023 May 11;11:e15345. doi: 10.7717/peerj.15345 (PMC10183164; doi:10.7717/peerj.15345)
Supplement: Supplemental Information 1 — Raw measurements and the output of all statistical analyses. [file peerj-11-15345-s001.xlsx]

## Sheet: Tab. S1 Solar Radiation
		Solar radiation (as kJ/m2) was determined by a CMB4 pyranometer from the National Meterological Institute,
		located at -26.950924 and -48.762031 (Itajaí A868 station), 25 km away from the mussel collection site
					see: http://www.inmet.gov.br
	Time	day-1	day-2
	05:00**	0	0		*paired t test = 3.012, d.f. = 12, p<0.0102
	06:00:00	74	63		*there is difference between days for UVR
	07:00:00	402	425
	08:00:00	561	933		Day-1 (sunny) was November 01, 2014
	09:00:00	1373	623		Day-2 (cloudy) was November 02, 2014
	10:00:00	2762	349		** Determined as global solar radiation from 4:01 AM to 5:00 AM. The hours were corrected for UTC time.
	11:00:00	1665	559
	12:00:00	1494	952		See Fig. 1 in main text
	13:00:00	2156	366
	14:00:00	2240	248
	15:00:00	1803	314
	16:00:00	572	326
	17:00:00	240	237
	18:00:00	39	91
	19:00:00	0	3
	20:00:00	0	0
	21:00:00	0	0
	SUM	15381	5489
		1183.15	422

## Sheet: Tab. S2 Temperature
		AIR TEMPERATURE							WATER TEMPERATURE
	Time	T oC Air- Sunny Day	T oC Air-Cloudy Day					Time	T oC Water - Sunny Day	T oC Water - Cloudy Day
	06:00:00	23		t test to compare Air temperature				06:00:00	22.5		t test to compare water temperature
	06:30:00		22.5	t = 0.42564				06:30:00		22.5	t = 0.045424
	06:40:00	23		p-value = 0.675				06:40:00	23		p-value = 0.9642
	07:30:00	24	23					07:30:00	24	23
	09:07:00	25						09:07:00	25
	09:30:00		25					09:30:00		25
	10:00:00	25						10:00:00	25
	10:30:00	25	25					10:30:00	25	25
	11:30:00		25					11:30:00		25
	12:15:00	26						12:15:00	26
	12:30:00		25					12:30:00		25
	14:05:00	26						14:05:00	25
	15:30:00	26	25					15:30:00	25	25
	17:30:00		24					17:30:00		24
	18:00:00	24						18:00:00	24
	18:30:00		24					18:30:00		24
	19:30:00		24					19:30:00		24
	20:45:00	23						20:45:00	23
	21:10:00	23						21:10:00	23
	21:30:00		24					21:30:00		24
*there are no significant difference (t test) between days neither among enviroments (p>0.05)

## Sheet: Tab. S3 Glutathione
								RAW DATA used to perform the two way Anovas
GSH-eq	Two way ANOVA							Treatment	Day	GSH-eq		Treatment	Day	GSH		Treatment	Day	GSSG		Treatment	Day	GSSG:GSHeq		log (GSGG:GSHeq)
Variation Source	Degree Freedom	Sum Square	Mean Square	F value	p			2h-AE	sunny	128.36		2h-AE	sunny	82.52		2h-AE	sunny	22.92		2h-AE	sunny	0.17857		-0.748192
Treatment	3	58509	19503	4.140	0.008			2h-AE	sunny	183.62		2h-AE	sunny	78.79		2h-AE	sunny	52.41		2h-AE	sunny	0.28544		-0.544485
Day	1	13481	13481	2.862	0.093			2h-AE	sunny	280.02		2h-AE	sunny	209.43		2h-AE	sunny	35.29		2h-AE	sunny	0.12604		-0.899492
Treatment*Day	3	47872	15957	3.388	0.021			2h-AE	sunny	233.16		2h-AE	sunny	151.06		2h-AE	sunny	41.05		2h-AE	sunny	0.17605		-0.754364
Residuals	101	475757	4710					2h-AE	sunny	181.57		2h-AE	sunny	109.74		2h-AE	sunny	35.92		2h-AE	sunny	0.19781		-0.703752
								2h-AE	sunny	227.49		2h-AE	sunny	202.67		2h-AE	sunny	12.41		2h-AE	sunny	0.05454		-1.26328
Kolmogorov-Smirnov normality test								2h-AE	sunny	190.71		2h-AE	sunny	111.09		2h-AE	sunny	39.81		2h-AE	sunny	0.20874		-0.680394
KS = 0.0546, p-value = 0.9019								2h-AE	sunny	221.49		2h-AE	sunny	38.07		2h-AE	sunny	91.71		2h-AE	sunny	0.41406		-0.382937
								2h-AE	sunny	130.1		2h-AE	sunny	77.42		2h-AE	sunny	26.34		2h-AE	sunny	0.20246		-0.693661
Tukey multiple comparisons of means								2h-AE	cloudy	195.71		2h-AE	cloudy	117.62		2h-AE	cloudy	39.04		2h-AE	cloudy	0.19951		-0.700035
Just showing the significant differences among treatments								2h-AE	cloudy	233.48		2h-AE	cloudy	146.65		2h-AE	cloudy	43.41		2h-AE	cloudy	0.18594		-0.730627
GSH-eq								2h-AE	cloudy	64.21		2h-AE	cloudy	21.59		2h-AE	cloudy	21.31		2h-AE	cloudy	0.33191		-0.47898
treatment 1	treatment 2	p<0.05						2h-AE	cloudy	181.24		2h-AE	cloudy	111.3		2h-AE	cloudy	34.97		2h-AE	cloudy	0.19295		-0.714555
4h-AE-sunny day	4h-AE-cloudy	0.019						2h-AE	cloudy	162.57		2h-AE	cloudy	105.43		2h-AE	cloudy	28.57		2h-AE	cloudy	0.17572		-0.755179
4h-AE-sunny day	1,3,7h-W-cloudy	0.001						2h-AE	cloudy	212.53		2h-AE	cloudy	121.88		2h-AE	cloudy	45.32		2h-AE	cloudy	0.21327		-0.67107
4h-AE-sunny day	1,3,7h-W sunny	0.004						2h-AE	cloudy	82.88		2h-AE	cloudy	32.58		2h-AE	cloudy	25.15		2h-AE	cloudy	0.30343		-0.517941
4h-AE-sunny day	2h-AE-cloudy	0.000						2h-AE	cloudy	259.24		2h-AE	cloudy	169.91		2h-AE	cloudy	44.66		2h-AE	cloudy	0.17229		-0.76374
4h-AE-sunny day	2h-AE-sunny	0.018						2h-AE	cloudy	159.88		2h-AE	cloudy	92.58		2h-AE	cloudy	33.65		2h-AE	cloudy	0.21048		-0.676789
								2h-AE	cloudy	163.41		2h-AE	cloudy	108.55		2h-AE	cloudy	27.43		2h-AE	cloudy	0.16788		-0.775001
							(1h-W)	1,3,7h-W	sunny	148.11		1,3,7h-W	sunny	67.77		1,3,7hW	sunny	40.17		1,3,7hW	sunny	0.2712		-0.56671
							(1h-W)	1,3,7h-W	sunny	254.46		1,3,7h-W	sunny	174.42		1,3,7hW	sunny	40.02		1,3,7hW	sunny	0.15728		-0.803326
GSH	Two way ANOVA						(1h-W)	1,3,7h-W	sunny	216.83		1,3,7h-W	sunny	147.76		1,3,7hW	sunny	34.54		1,3,7hW	sunny	0.15928		-0.797839
Variation Source	Degree Freedom	Sum Square	Mean Square	F value	p		(1h-W)	1,3,7h-W	sunny	277.14		1,3,7h-W	sunny	190.84		1,3,7hW	sunny	43.15		1,3,7hW	sunny	0.15569		-0.807739
Treatment	3	66785	22262	5.172	0.002		(1h-W)	1,3,7h-W	sunny	167.55		1,3,7h-W	sunny	83.72		1,3,7hW	sunny	41.92		1,3,7hW	sunny	0.25018		-0.601747
Day	1	6779	6779	1.575	0.212		(1h-W)	1,3,7h-W	sunny	163.73		1,3,7h-W	sunny	95.2		1,3,7hW	sunny	34.26		1,3,7hW	sunny	0.20927		-0.679293
Treatment*Day	3	34924	11641	2.705	0.049		(1h-W)	1,3,7hW	sunny	324.563		1,3,7hW	sunny	216.246		1,3,7hW	sunny	54.1582		1,3,7hW	sunny	0.16687		-0.777622
Residuals	101	434723	4304				(3h-W)	1,3,7h-W	sunny	288.72		1,3,7h-W	sunny	220.9		1,3,7hW	sunny	33.91		1,3,7hW	sunny	0.11745		-0.930147
							(3h-W)	1,3,7h-W	sunny	163.82		1,3,7h-W	sunny	103.29		1,3,7hW	sunny	30.26		1,3,7hW	sunny	0.18474		-0.733439
Kolmogorov-Smirnov normality test							(3h-W)	1,3,7h-W	sunny	122.58		1,3,7h-W	sunny	69.92		1,3,7hW	sunny	26.33		1,3,7hW	sunny	0.2148		-0.667966
KS = 0.088, p-value = 0.3668							(3h-W)	1,3,7h-W	sunny	120.09		1,3,7h-W	sunny	56.94		1,3,7hW	sunny	31.57		1,3,7hW	sunny	0.26294		-0.580143
							(3h-W)	1,3,7h-W	sunny	135.39		1,3,7h-W	sunny	89.92		1,3,7hW	sunny	22.73		1,3,7hW	sunny	0.16793		-0.774872
Tukey multiple comparisons of means							(3h-W)	1,3,7h-W	sunny	182.66		1,3,7h-W	sunny	122.71		1,3,7hW	sunny	29.98		1,3,7hW	sunny	0.1641		-0.784891
Just showing the significant differences among treatments							(3h-W)	1,3,7h-W	sunny	262.64		1,3,7h-W	sunny	217.57		1,3,7hW	sunny	22.54		1,3,7hW	sunny	0.08581		-1.06646
GSH							(3h-W)	1,3,7h-W	sunny	265.78		1,3,7h-W	sunny	183.07		1,3,7hW	sunny	41.36		1,3,7hW	sunny	0.15561		-0.807962
treatment 1	treatment 2	p<0.05					(3h-W)	1,3,7h-W	sunny	138.6		1,3,7h-W	sunny	97.77		1,3,7hW	sunny	20.42		1,3,7hW	sunny	0.1473		-0.831797
4h-AE-sunny day	1,3,7h-W-cloudy	0.004					(7h-W)	1,3,7h-W	sunny	205.36		1,3,7h-W	sunny	135.75		1,3,7hW	sunny	34.8		1,3,7hW	sunny	0.16948		-0.770882
4h-AE-sunny day	1,3,7h-W sunny	0.008					(7h-W)	1,3,7h-W	sunny	228.72		1,3,7h-W	sunny	195.29		1,3,7hW	sunny	16.72		1,3,7hW	sunny	0.07308		-1.1362
4h-AE-sunny day	2h-AE-cloudy	0.001					(7h-W)	1,3,7h-W	sunny	120		1,3,7h-W	sunny	90.6		1,3,7hW	sunny	14.7		1,3,7hW	sunny	0.1225		-0.911864
4h-AE-sunny day	2h-AE-sunny	0.011					(7h-W)	1,3,7h-W	sunny	217.88		1,3,7h-W	sunny	149.72		1,3,7hW	sunny	34.08		1,3,7hW	sunny	0.15642		-0.805708
							(7h-W)	1,3,7h-W	sunny	272.98		1,3,7h-W	sunny	178.36		1,3,7hW	sunny	47.31		1,3,7hW	sunny	0.1733		-0.761201
							(7h-W)	1,3,7h-W	sunny	218.04		1,3,7h-W	sunny	169.63		1,3,7hW	sunny	24.21		1,3,7hW	sunny	0.11103		-0.95456
GSSG	Two way ANOVA						(7h-W)	1,3,7h-W	sunny	202		1,3,7h-W	sunny	127.41		1,3,7hW	sunny	37.29		1,3,7hW	sunny	0.18461		-0.733745
Variation Source	Degree Freedom	Sum Square	Mean Square	F value	p		(7h-W)	1,3,7h-W	sunny	179.9		1,3,7h-W	sunny	122.65		1,3,7hW	sunny	28.62		1,3,7hW	sunny	0.15911		-0.798303
Treatment	3	429	143.0	0.519	0.670		(7h-W)	1,3,7h-W	sunny	284.9		1,3,7h-W	sunny	101.49		1,3,7hW	sunny	91.71		1,3,7hW	sunny	0.32189		-0.492293
Day	1	285	285.3	1.035	0.311		(1h-W)	1,3,7h-W	cloudy	250.39		1,3,7h-W	cloudy	100.29		1,3,7hW	cloudy	75.05		1,3,7hW	cloudy	0.29973		-0.52327
Treatment*Day	3	323	107.6	0.391	0.760		(1h-W)	1,3,7h-W	cloudy	235.77		1,3,7h-W	cloudy	167.61		1,3,7hW	cloudy	34.08		1,3,7hW	cloudy	0.14454		-0.840012
Residuals	101	27830	275.5				(1h-W)	1,3,7h-W	cloudy	216.58		1,3,7h-W	cloudy	151.85		1,3,7hW	cloudy	32.36		1,3,7hW	cloudy	0.14943		-0.825562
							(1h-W)	1,3,7h-W	cloudy	77.38		1,3,7h-W	cloudy	33.5		1,3,7hW	cloudy	21.94		1,3,7hW	cloudy	0.28354		-0.547386
Kolmogorov-Smirnov normality test							(1h-W)	1,3,7h-W	cloudy	255.11		1,3,7h-W	cloudy	155.43		1,3,7hW	cloudy	49.84		1,3,7hW	cloudy	0.19537		-0.709142
kS = 0.1297, p-value = 0.05101							(1h-W)	1,3,7h-W	cloudy	195.88		1,3,7h-W	cloudy	142.03		1,3,7hW	cloudy	26.92		1,3,7hW	cloudy	0.13745		-0.861855
							(1h-W)	1,3,7h-W	cloudy	105.89		1,3,7h-W	cloudy	55.16		1,3,7hW	cloudy	25.36		1,3,7hW	cloudy	0.23953		-0.62064
							(1h-W)	1,3,7h-W	cloudy	172.42		1,3,7h-W	cloudy	109.15		1,3,7hW	cloudy	31.63		1,3,7hW	cloudy	0.18346		-0.736459
							(1h-W)	1,3,7h-W	cloudy	279.67		1,3,7h-W	cloudy	219.15		1,3,7hW	cloudy	30.26		1,3,7hW	cloudy	0.1082		-0.965773
GSSG:GSHeq	Two way ANOVA						(3h-W)	1,3,7h-W	cloudy	166.51		1,3,7h-W	cloudy	140.37		1,3,7hW	cloudy	13.07		1,3,7hW	cloudy	0.07851		-1.10508
Variation Source	Degree Freedom	Sum Square	Mean Square	F value	p		(3h-W)	1,3,7h-W	cloudy	265.35		1,3,7h-W	cloudy	241.09		1,3,7hW	cloudy	12.13		1,3,7hW	cloudy	0.04571		-1.33999
Treatment	3	0.4493	0.1497	3.92	0.0107		(3h-W)	1,3,7h-W	cloudy	250.48		1,3,7h-W	cloudy	177.47		1,3,7hW	cloudy	36.5		1,3,7hW	cloudy	0.14574		-0.836421
Day	1	0.0080	0.0080	0.21	0.6480		(3h-W)	1,3,7h-W	cloudy	132.61		1,3,7h-W	cloudy	99.89		1,3,7hW	cloudy	16.36		1,3,7hW	cloudy	0.12335		-0.908861
Treatment*Day	3	0.0681	0.0227	0.60	0.6194		(3h-W)	1,3,7h-W	cloudy	167.64		1,3,7h-W	cloudy	113.54		1,3,7hW	cloudy	27.05		1,3,7hW	cloudy	0.16135		-0.792231
Residuals	101	385495	0.0381				(3h-W)	1,3,7h-W	cloudy	217.19		1,3,7h-W	cloudy	119.7		1,3,7hW	cloudy	48.75		1,3,7hW	cloudy	0.22444		-0.6489
							(3h-W)	1,3,7h-W	cloudy	194.07		1,3,7h-W	cloudy	40.75		1,3,7hW	cloudy	76.66		1,3,7hW	cloudy	0.39502		-0.403381
Data on GSSG:GSHeq ratio were log-tranformed							(3h-W)	1,3,7h-W	cloudy	195.61		1,3,7h-W	cloudy	139.1		1,3,7hW	cloudy	28.26		1,3,7hW	cloudy	0.14444		-0.840313
							(3h-W)	1,3,7h-W	cloudy	359.3		1,3,7h-W	cloudy	276.76		1,3,7hW	cloudy	41.27		1,3,7hW	cloudy	0.11487		-0.939793
Kolmogorov-Smirnov normality test							(7h-W)	1,3,7h-W	cloudy	88.27		1,3,7h-W	cloudy	45.84		1,3,7hW	cloudy	21.22		1,3,7hW	cloudy	0.24037		-0.61912
KS = 0.1067, p-value = 0.1673							(7h-W)	1,3,7h-W	cloudy	202.97		1,3,7h-W	cloudy	163.77		1,3,7hW	cloudy	19.6		1,3,7hW	cloudy	0.09656		-1.0152
							(7h-W)	1,3,7h-W	cloudy	167.64		1,3,7h-W	cloudy	113.79		1,3,7hW	cloudy	26.92		1,3,7hW	cloudy	0.1606		-0.794254
There are no differences among groups							(7h-W)	1,3,7h-W	cloudy	165.83		1,3,7h-W	cloudy	130.39		1,3,7hW	cloudy	17.72		1,3,7hW	cloudy	0.10686		-0.971185
							(7h-W)	1,3,7h-W	cloudy	112.87		1,3,7h-W	cloudy	51.41		1,3,7hW	cloudy	30.73		1,3,7hW	cloudy	0.27225		-0.565032
							(7h-W)	1,3,7h-W	cloudy	200.21		1,3,7h-W	cloudy	112.82		1,3,7hW	cloudy	43.7		1,3,7hW	cloudy	0.21825		-0.661046
							(7h-W)	1,3,7h-W	cloudy	263.19		1,3,7h-W	cloudy	151.64		1,3,7hW	cloudy	55.77		1,3,7hW	cloudy	0.21192		-0.673828
							(7h-W)	1,3,7h-W	cloudy	264.41		1,3,7h-W	cloudy	165.94		1,3,7hW	cloudy	49.23		1,3,7hW	cloudy	0.1862		-0.73002
							(7h-W)	1,3,7h-W	cloudy	262.62		1,3,7h-W	cloudy	181.46		1,3,7hW	cloudy	40.58		1,3,7hW	cloudy	0.15453		-0.810987
								30min-AE	sunny	70.56		30min-AE	sunny	35.79		30min-AE	sunny	17.38		30min-AE	sunny	0.24637		-0.608412
								30min-AE	sunny	127.95		30min-AE	sunny	67.27		30min-AE	sunny	30.34		30min-AE	sunny	0.23714		-0.624995
								30min-AE	sunny	391.89		30min-AE	sunny	339.16		30min-AE	sunny	26.37		30min-AE	sunny	0.06729		-1.17205
								30min-AE	sunny	113.46		30min-AE	sunny	76.76		30min-AE	sunny	18.35		30min-AE	sunny	0.16173		-0.791209
								30min-AE	sunny	98.7		30min-AE	sunny	32.72		30min-AE	sunny	32.99		30min-AE	sunny	0.33423		-0.475955
								30min-AE	sunny	278.71		30min-AE	sunny	209.54		30min-AE	sunny	34.59		30min-AE	sunny	0.12409		-0.906263
								30min-AE	sunny	143.36		30min-AE	sunny	37.07		30min-AE	sunny	53.14		30min-AE	sunny	0.37071		-0.430966
								30min-AE	sunny	423.7		30min-AE	sunny	385.6		30min-AE	sunny	19.05		30min-AE	sunny	0.04496		-1.34717
								30min-AE	sunny	232.78		30min-AE	sunny	159.36		30min-AE	sunny	36.71		30min-AE	sunny	0.15769		-0.802196
								30min-AE	sunny	248.776		30min-AE	sunny	167.621		30min-AE	sunny	40.5775		30min-AE	sunny	0.163116		-0.787503
								30min-AE	cloudy	243.7		30min-AE	cloudy	176.58		30min-AE	cloudy	33.56		30min-AE	cloudy	0.13772		-0.861003
								30min-AE	cloudy	154.94		30min-AE	cloudy	94.87		30min-AE	cloudy	30.03		30min-AE	cloudy	0.19384		-0.712557
								30min-AE	cloudy	254.28		30min-AE	cloudy	181.87		30min-AE	cloudy	36.21		30min-AE	cloudy	0.14239		-0.846521
								30min-AE	cloudy	155.87		30min-AE	cloudy	122.29		30min-AE	cloudy	16.79		30min-AE	cloudy	0.10771		-0.967744
								30min-AE	cloudy	237.72		30min-AE	cloudy	169.05		30min-AE	cloudy	34.33		30min-AE	cloudy	0.14442		-0.840373
								30min-AE	cloudy	389.65		30min-AE	cloudy	326.61		30min-AE	cloudy	31.52		30min-AE	cloudy	0.08089		-1.09211
								30min-AE	cloudy	239.08		30min-AE	cloudy	193.56		30min-AE	cloudy	22.76		30min-AE	cloudy	0.0952		-1.02136
								4h-AE	sunny	393.78		4h-AE	sunny	353.83		4h-AE	sunny	19.98		4h-AE	sunny	0.05073		-1.29474
								4h-AE	sunny	208.95		4h-AE	sunny	125.99		4h-AE	sunny	41.48		4h-AE	sunny	0.19851		-0.702218
								4h-AE	sunny	240.31		4h-AE	sunny	178.84		4h-AE	sunny	30.73		4h-AE	sunny	0.12789		-0.893163
								4h-AE	sunny	316.24		4h-AE	sunny	215.93		4h-AE	sunny	50.15		4h-AE	sunny	0.15859		-0.799724
								4h-AE	sunny	305.65		4h-AE	sunny	229.48		4h-AE	sunny	38.09		4h-AE	sunny	0.12461		-0.904447
								4h-AE	sunny	269.4		4h-AE	sunny	176.01		4h-AE	sunny	46.7		4h-AE	sunny	0.17334		-0.761101
								4h-AE	sunny	315.97		4h-AE	sunny	239.28		4h-AE	sunny	38.34		4h-AE	sunny	0.12135		-0.91596
								4h-AE	sunny	324.56		4h-AE	sunny	195.87		4h-AE	sunny	64.35		4h-AE	sunny	0.19825		-0.702787
								4h-AE	sunny	313.47		4h-AE	sunny	234.163		4h-AE	sunny	39.6533		4h-AE	sunny	0.12649		-0.897944
								4h-AE	sunny	327.92		4h-AE	sunny	275.512		4h-AE	sunny	26.204		4h-AE	sunny	0.0799		-1.09745
								4h-AE	sunny	322.374		4h-AE	sunny	241.578		4h-AE	sunny	40.3977		4h-AE	sunny	0.125322		-0.901973
								4h-AE	cloudy	294.55		4h-AE	cloudy	77.5		4h-AE	cloudy	108.53		4h-AE	cloudy	0.36844		-0.433633
								4h-AE	cloudy	266.01		4h-AE	cloudy	208.84		4h-AE	cloudy	28.58		4h-AE	cloudy	0.10746		-0.968753
								4h-AE	cloudy	133.96		4h-AE	cloudy	82.85		4h-AE	cloudy	25.56		4h-AE	cloudy	0.19079		-0.719444
								4h-AE	cloudy	165.53		4h-AE	cloudy	139.7		4h-AE	cloudy	12.91		4h-AE	cloudy	0.07801		-1.10785
								4h-AE	cloudy	171.92		4h-AE	cloudy	149.29		4h-AE	cloudy	11.32		4h-AE	cloudy	0.06582		-1.18164
								4h-AE	cloudy	240.56		4h-AE	cloudy	209.93		4h-AE	cloudy	15.31		4h-AE	cloudy	0.06366		-1.19613
								4h-AE	cloudy	160.61		4h-AE	cloudy	136.47		4h-AE	cloudy	12.07		4h-AE	cloudy	0.07515		-1.12407
								4h-AE	cloudy	160.58		4h-AE	cloudy	98.77		4h-AE	cloudy	30.91		4h-AE	cloudy	0.19247		-0.715637
								4h-AE	cloudy	193.82		4h-AE	cloudy	118.3		4h-AE	cloudy	37.76		4h-AE	cloudy	0.19481		-0.710389
								4h-AE	cloudy	221.832		4h-AE	cloudy	181.259		4h-AE	cloudy	20.286		4h-AE	cloudy	0.091466		-1.03874

## Sheet: Tab. S4 Antioxidant Enzymes
												RAW DATA used to perform the two way anovas
CATALASE												Activities are in Units per mg/protein					Activities are in mU per mg/protein					Activities are in mU per mg/protein					Activities are in mU per mg/protein
Variation Source	Degree Freedom	Sum Square	Mean Square	F value	p							Treatment	Day	CATALASE			Treatment	Day	GR			Treatment	Day	GST			Treatment	Day	G6PDH
Treatment	2	13124.0	6562	1.159	0.323						(3h-W)	3,7h-W	sunny	257.061		(3h-W)	3,7h-W	sunny	17.3701		(3h-W)	3,7h-W	sunny	204.572		(3h-W)	3,7h-W	sunny	6.68836
Day	1	220.0	220.0	0.039	0.844						(3h-W)	3,7h-W	sunny	202.529		(3h-W)	3,7h-W	sunny	27.6391		(3h-W)	3,7h-W	sunny	237.13		(3h-W)	3,7h-W	sunny	23.8535
Treatment*Day	2	4497.0	2249.0	0.397	0.674						(3h-W)	3,7h-W	sunny	220.004		(3h-W)	3,7h-W	sunny	19.5789		(3h-W)	3,7h-W	sunny	246.124		(3h-W)	3,7h-W	sunny	17.7415
Residuals	45	254718.0	5660.0								(3h-W)	3,7h-W	sunny	231.486		(3h-W)	3,7h-W	sunny	28.0584		(3h-W)	3,7h-W	sunny	329.753		(3h-W)	3,7h-W	sunny	13.6582
											(3h-W)	3,7h-W	sunny	246.527		(3h-W)	3,7h-W	sunny	22.3165		(3h-W)	3,7h-W	sunny	241.674		(3h-W)	3,7h-W	sunny	11.9407
GR											(3h-W)	3,7h-W	sunny	220.074		(3h-W)	3,7h-W	sunny	34.5467		(3h-W)	3,7h-W	sunny	350.412		(7h-W)	3,7h-W	sunny	21.9786
Variation Source	Degree Freedom	Sum Square	Mean Square	F value	p						(7h-W)	3,7h-W	sunny	150.105		(7h-W)	3,7h-W	sunny	30.2853		(7h-W)	3,7h-W	sunny	215.611		(7h-W)	3,7h-W	sunny	23.4818
Treatment	2	4.3	2.17	0.039	0.962						(7h-W)	3,7h-W	sunny	444.772		(7h-W)	3,7h-W	sunny	20.1131		(7h-W)	3,7h-W	sunny	255.004		(7h-W)	3,7h-W	sunny	16.8567
Day	1	24.9	24.90	0.444	0.509						(7h-W)	3,7h-W	sunny	169.742		(7h-W)	3,7h-W	sunny	12.939		(7h-W)	3,7h-W	sunny	143.962		(7h-W)	3,7h-W	sunny	26.9357
Treatment*Day	2	435.1	217.54	3.868	0.029*						(7h-W)	3,7h-W	sunny	241.193		(7h-W)	3,7h-W	sunny	29.5685		(7h-W)	3,7h-W	sunny	279.338		(7h-W)	3,7h-W	sunny	6.68604
Residuals	39	2193.4	56.24								(7h-W)	3,7h-W	sunny	163.892		(7h-W)	3,7h-W	sunny	21.1215		(7h-W)	3,7h-W	sunny	235.239		(7h-W)	3,7h-W	sunny	12.9797
											(7h-W)	3,7h-W	sunny	269.847		(7h-W)	3,7h-W	sunny	26.65		(7h-W)	3,7h-W	sunny	318.097		(3h-W)	3,7h-W	cloudy	28.1687
* Despite this significant value, the Tukey-HSD test did not found significant differences among mean values for the											(3h-W)	3,7h-W	cloudy	402.911		(3h-W)	3,7h-W	cloudy	35.6966		(3h-W)	3,7h-W	cloudy	301.829		(3h-W)	3,7h-W	cloudy	28.6249
treatments (two by two comparisons). Only one comparison had this significant difference (if we consider p<0.1):											(3h-W)	3,7h-W	cloudy	338.813		(3h-W)	3,7h-W	cloudy	33.2534		(3h-W)	3,7h-W	cloudy	240.459		(3h-W)	3,7h-W	cloudy	17.507
"30min-AE sunny day" is different to "30min-AE cloudy day" p = 0.097 (influenced by high variance). Thus, we											(3h-W)	3,7h-W	cloudy	207.489		(3h-W)	3,7h-W	cloudy	28.098		(3h-W)	3,7h-W	cloudy	176.73		(3h-W)	3,7h-W	cloudy	17.0764
accepted the null hypothesis (all groups have the same mean)											(3h-W)	3,7h-W	cloudy	254.155		(3h-W)	3,7h-W	cloudy	21.6102		(3h-W)	3,7h-W	cloudy	197.509		(3h-W)	3,7h-W	cloudy	7.11845
											(3h-W)	3,7h-W	cloudy	253.416		(3h-W)	3,7h-W	cloudy	27.4904		(3h-W)	3,7h-W	cloudy	282.31		(3h-W)	3,7h-W	cloudy	17.5122
GST											(3h-W)	3,7h-W	cloudy	240.956		(7h-W)	3,7h-W	cloudy	24.4023		(7h-W)	3,7h-W	cloudy	286.514		(7h-W)	3,7h-W	cloudy	9.24926
Variation Source	Degree Freedom	Sum Square	Mean Square	F value	p						(3h-W)	3,7h-W	cloudy	214.013		(7h-W)	3,7h-W	cloudy	16.8562		(7h-W)	3,7h-W	cloudy	238		(7h-W)	3,7h-W	cloudy	11.4544
Treatment	2	23253	11627	2.655	0.0833						(7h-W)	3,7h-W	cloudy	274.702		(7h-W)	3,7h-W	cloudy	26.7764		(7h-W)	3,7h-W	cloudy	330.252		(7h-W)	3,7h-W	cloudy	11.0674
Day	1	3291	3291	0.752	0.3914						(7h-W)	3,7h-W	cloudy	181.528		(7h-W)	3,7h-W	cloudy	26.051		(7h-W)	3,7h-W	cloudy	352.584		(7h-W)	3,7h-W	cloudy	14.415
Treatment*Day	2	23599	11800	2.695	0.0805						(7h-W)	3,7h-W	cloudy	115.933		(7h-W)	3,7h-W	cloudy	31.5465		(7h-W)	3,7h-W	cloudy	415.717		(7h-W)	3,7h-W	cloudy	6.89468
Residuals	38	166395	4379								(7h-W)	3,7h-W	cloudy	240.419			30min-AE	sunny	37.4916			30min-AE	sunny	276.898			30min-AE	sunny	23.4604
											(7h-W)	3,7h-W	cloudy	260.704			30min-AE	sunny	37.8345			30min-AE	sunny	220.32			30min-AE	sunny	17.2616
G6PDH												30min-AE	sunny	239.411			30min-AE	sunny	28.404			30min-AE	sunny	185.433			30min-AE	sunny	16.8175
Variation Source	Degree Freedom	Sum Square	Mean Square	F value	p							30min-AE	sunny	308.255			30min-AE	sunny	23.746			30min-AE	sunny	265.106			30min-AE	sunny	28.4435
Treatment	2	24.8	12.41	0.246	0.7829							30min-AE	sunny	124.828			30min-AE	sunny	19.6524			30min-AE	sunny	414.243			30min-AE	sunny	22.0061
Day	1	20.1	20.1	0.400	0.5309							30min-AE	sunny	261.905			30min-AE	sunny	42.724			30min-AE	sunny	355.889			30min-AE	sunny	20.3408
Treatment*Day	2	254.7	127.3	2.528	0.0928							30min-AE	sunny	251.412			30min-AE	cloudy	20.5091			30min-AE	cloudy	247.603			30min-AE	cloudy	11.8372
Residuals	39	1964.8	50.38									30min-AE	sunny	357.23			30min-AE	cloudy	17.8903			30min-AE	cloudy	257.872			30min-AE	cloudy	10.1732
												30min-AE	cloudy	325.666			30min-AE	cloudy	18.9711			30min-AE	cloudy	254.175			30min-AE	cloudy	9.66361
												30min-AE	cloudy	186.723			30min-AE	cloudy	20.5353			30min-AE	cloudy	238.712			30min-AE	cloudy	17.9314
												30min-AE	cloudy	329.844			30min-AE	cloudy	18.926			30min-AE	cloudy	210.234			30min-AE	cloudy	15.4082
												30min-AE	cloudy	208.188			4h-AE	sunny	42.392			4h-AE	sunny	206.566			4h-AE	sunny	22.564
												30min-AE	cloudy	183.757			4h-AE	sunny	22.0256			4h-AE	sunny	156.522			4h-AE	sunny	16.7995
												30min-AE	cloudy	253.173			4h-AE	sunny	28.8071			4h-AE	sunny	330.304			4h-AE	sunny	9.59875
												4h-AE	sunny	368.494			4h-AE	sunny	20.1747			4h-AE	sunny	204.339			4h-AE	sunny	19.4451
												4h-AE	sunny	130.503			4h-AE	sunny	10.5313			4h-AE	sunny	268.33			4h-AE	sunny	17.7365
												4h-AE	sunny	162.68			4h-AE	sunny	19.1001			4h-AE	sunny	334.003			4h-AE	sunny	3.34882
												4h-AE	sunny	346.993			4h-AE	sunny	32.8601			4h-AE	cloudy	133.496			4h-AE	sunny	5.41612
												4h-AE	sunny	212.177			4h-AE	cloudy	26.2635			4h-AE	cloudy	183.456			4h-AE	cloudy	15.7962
												4h-AE	sunny	138.024			4h-AE	cloudy	25.2423			4h-AE	cloudy	262.703			4h-AE	cloudy	18.4199
												4h-AE	sunny	233.334			4h-AE	cloudy	41.5022			4h-AE	cloudy	83.2072			4h-AE	cloudy	34.3366
												4h-AE	sunny	240.482			4h-AE	cloudy	15.1546			4h-AE	cloudy	188.308			4h-AE	cloudy	19.8086
												4h-AE	sunny	178.796			4h-AE	cloudy	18.3294								4h-AE	cloudy	4.70502
												4h-AE	cloudy	246.365
												4h-AE	cloudy	186.723
												4h-AE	cloudy	298.539
												4h-AE	cloudy	146.864
												4h-AE	cloudy	135.607
												4h-AE	cloudy	145.615

## Sheet: Tab. S5 TBARS
	TBARS levels are in nmol/gww				Df Sum Sq Mean Sq F value Pr(>F)
	Treatment	Day	TBARS levels		trat 2 1031 515.5 1.837 0.1705
	>2 h AE	Sunny	6.85631		day 1 128 128.0 0.456 0.5027
	>2 h AE	Sunny	2.737		trat:day 2 2810 1405.2 5.009 0.0107 *
	>2 h AE	Sunny	2.43046		Residuals 47 13187 280.6
	>2 h AE	Sunny	5.77447		---
	>2 h AE	Sunny	5.42488		Signif. codes: 0 ‘***’ 0.001 ‘**’ 0.01 ‘*’ 0.05 ‘.’ 0.1 ‘ ’ 1
	>2 h AE	Sunny	9.99071		> TukeyHSD(resultado)
	>2 h AE	Sunny	31.9974		Tukey multiple comparisons of means
	>2 h AE	Sunny	25.5591		95% family-wise confidence level
	>2 h AE	Sunny	5.26812
	>2 h AE	Cloudy	3.30337		Fit: aov(formula = TBAR ~ trat * day, data = MEXI)
	>2 h AE	Cloudy	21.5629
	>2 h AE	Cloudy	19.9585		$trat
	>2 h AE	Cloudy	21.3209		diff lwr upr p adj
	>2 h AE	Cloudy	60.9286		4hAE-2hAE 5.880782 -7.631638 19.393202 0.5474922
	>2 h AE	Cloudy	4.56923		7hW-2hAE -4.955012 -18.664704 8.754680 0.6587626
	>2 h AE	Cloudy	25.9352		7hW-4hAE -10.835794 -24.545486 2.873898 0.1462959
	>2 h AE	Cloudy	4.59198
	>2 h AE	Cloudy	48.4657		$day
	7 h W	Sunny	4.9102		diff lwr upr p adj
	7 h W	Sunny	4.66046		sunny-cloudy -3.107334 -12.36622 6.151547 0.5028875
	7 h W	Sunny	2.85455
	7 h W	Sunny	12.468		$`trat:day`
	7 h W	Sunny	1.80572		diff lwr upr
	7 h W	Sunny	5.09365		4hAE:cloudy-2hAE:cloudy -9.070963 -32.526014 14.384087
	7 h W	Sunny	1.3097		7hW:cloudy-2hAE:cloudy -4.529878 -27.984928 18.925173
	7 h W	Sunny	2.43238		2hAE:sunny-2hAE:cloudy -12.733113 -36.188163 10.721938
	7 h W	Cloudy	10.427		4hAE:sunny-2hAE:cloudy 8.099415 -15.355636 31.554465
	7 h W	Cloudy	2.68507		7hW:sunny-2hAE:cloudy -18.962221 -43.139133 5.214692
	7 h W	Cloudy	8.53932		7hW:cloudy-4hAE:cloudy 4.541085 -18.913965 27.996136
	7 h W	Cloudy	3.96396		2hAE:sunny-4hAE:cloudy -3.662149 -27.117200 19.792901
	7 h W	Cloudy	1.47989		4hAE:sunny-4hAE:cloudy 17.170378 -6.284673 40.625428
	7 h W	Cloudy	43.5658		7hW:sunny-4hAE:cloudy -9.891257 -34.068170 14.285655
	7 h W	Cloudy	4.14601		2hAE:sunny-7hW:cloudy -8.203235 -31.658285 15.251816
	7 h W	Cloudy	29.5797		4hAE:sunny-7hW:cloudy 12.629292 -10.825758 36.084343
	7 h W	Cloudy	65.4809		7hW:sunny-7hW:cloudy -14.432343 -38.609256 9.744570
	4 h AE	Sunny	3.95658		4hAE:sunny-2hAE:sunny 20.832527 -2.622523 44.287578
	4 h AE	Sunny	16.6686		7hW:sunny-2hAE:sunny -6.229108 -30.406021 17.947805
	4 h AE	Sunny	49.5811		7hW:sunny-4hAE:sunny -27.061635 -51.238548 -2.884723
	4 h AE	Sunny	54.6896		p adj
	4 h AE	Sunny	71.3391		4hAE:cloudy-2hAE:cloudy 0.8582077
	4 h AE	Sunny	33.5122		7hW:cloudy-2hAE:cloudy 0.9922927
	4 h AE	Sunny	32.9899		2hAE:sunny-2hAE:cloudy 0.5945919
	4 h AE	Sunny	9.32361		4hAE:sunny-2hAE:cloudy 0.9069087
	4 h AE	Sunny	11.4706		7hW:sunny-2hAE:cloudy 0.2028729
	4 h AE	Cloudy	13.4632		7hW:cloudy-4hAE:cloudy 0.9922044
	4 h AE	Cloudy	5.38537		2hAE:sunny-4hAE:cloudy 0.9971507
	4 h AE	Cloudy	4.86202		4hAE:sunny-4hAE:cloudy 0.2688392
	4 h AE	Cloudy	9.7402		7hW:sunny-4hAE:cloudy 0.8272351
	4 h AE	Cloudy	19.418		2hAE:sunny-7hW:cloudy 0.9022605
	4 h AE	Cloudy	31.0251		4hAE:sunny-7hW:cloudy 0.6030013
	4 h AE	Cloudy	6.99916		7hW:sunny-7hW:cloudy 0.4923179
	4 h AE	Cloudy	22.0224		4hAE:sunny-2hAE:sunny 0.1080569
	4 h AE	Cloudy	16.0824		7hW:sunny-2hAE:sunny 0.9719826
					7hW:sunny-4hAE:sunny 0.0200819
					> leveneTest(TBAR~trat*day,data=MEXI)
					Levene's Test for Homogeneity of Variance (center = median)
					Df F value Pr(>F)
					group 5 2.3818 0.05252 .
					47

## Sheet: Tab. S6 Metabolic Enzymes
	Enzymatic activity levels are in mU/mg protein							ANOVAs one way
	Treatment	Day	MDH	IDH	PK			> resultado<-aov(MDH~Group,data=ENZI)
	7 h W	Sunny	453.471	34.1567	172.983			> summary(resultado)
	7 h W	Sunny	1803.31	49.0225	92.9996			Df Sum Sq Mean Sq F value Pr(>F)
	7 h W	Sunny	1390.25	36.6993	108.889			Group 3 70878 23626 0.081 0.97
	7 h W	Sunny	1917.33	56.0838	121.599			Residuals 20 5838669 291933
	7 h W	Sunny	1436.77	29.2458				> resultado<-aov(IDH~Group,data=ENZI)
	7 h W	Sunny	1358.78	66.5259				> summary(resultado)
	7 h W	Cloudy	1353.9	44.1785	50.7246			Df Sum Sq Mean Sq F value Pr(>F)
	7 h W	Cloudy	1826.33	52.8092	78.535			Group 3 76 25.43 0.099 0.959
	7 h W	Cloudy	650.121	41.1477	132.035			Residuals 18 4609 256.07
	7 h W	Cloudy	1037.22	61.6502	432.01			2 observations deleted due to missingness
	7 h W	Cloudy	1537.99	38.7863				> resultado<-aov(PK~Group,data=ENZI)
	4 h AE	Sunny	924.762	71.0696	133.006			> summary(resultado)
	4 h AE	Sunny	1340.75	57.7711	30.8222			Df Sum Sq Mean Sq F value Pr(>F)
	4 h AE	Sunny	432.488	39.926	144.73			Group 3 14439 4813 0.603 0.622
	4 h AE	Sunny	1766.36	45.611	57.9203			Residuals 16 127681 7980
	4 h AE	Sunny	2023.7	33.3841	110.577			4 observations deleted due to missingness
	4 h AE	Sunny	1547.92	58.3288	98.7052
	4 h AE	Sunny	879.687	42.9234				ANOVA two way
	4 h AE	Cloudy	995.611	88.4594	87.9918			[1] "Group" "day" "trat" "MDH" "IDH" "PK"
	4 h AE	Cloudy	2115.62	42.5169	174.492			> resultado<-aov(MDH~trat*day,data=ENZI)
	4 h AE	Cloudy	946.639	40.461	231.31			> summary(resultado)
	4 h AE	Cloudy	405.417	26.0821	143.925			Df Sum Sq Mean Sq F value Pr(>F)
	4 h AE	Cloudy	1405.57		56.2312			trat 1 35449 35449 0.121 0.731
	4 h AE	Cloudy	1662.87		83.7072			day 1 22409 22409 0.077 0.785
								trat:day 1 13019 13019 0.045 0.835
								Residuals 20 5838669 291933
